# Supplementary material
Source: Springer Nature journal article supplement (https://www.springermedizin.de/resource/supplementary/12978_2013_228_MOESM1_ESM.pdf/9602290)

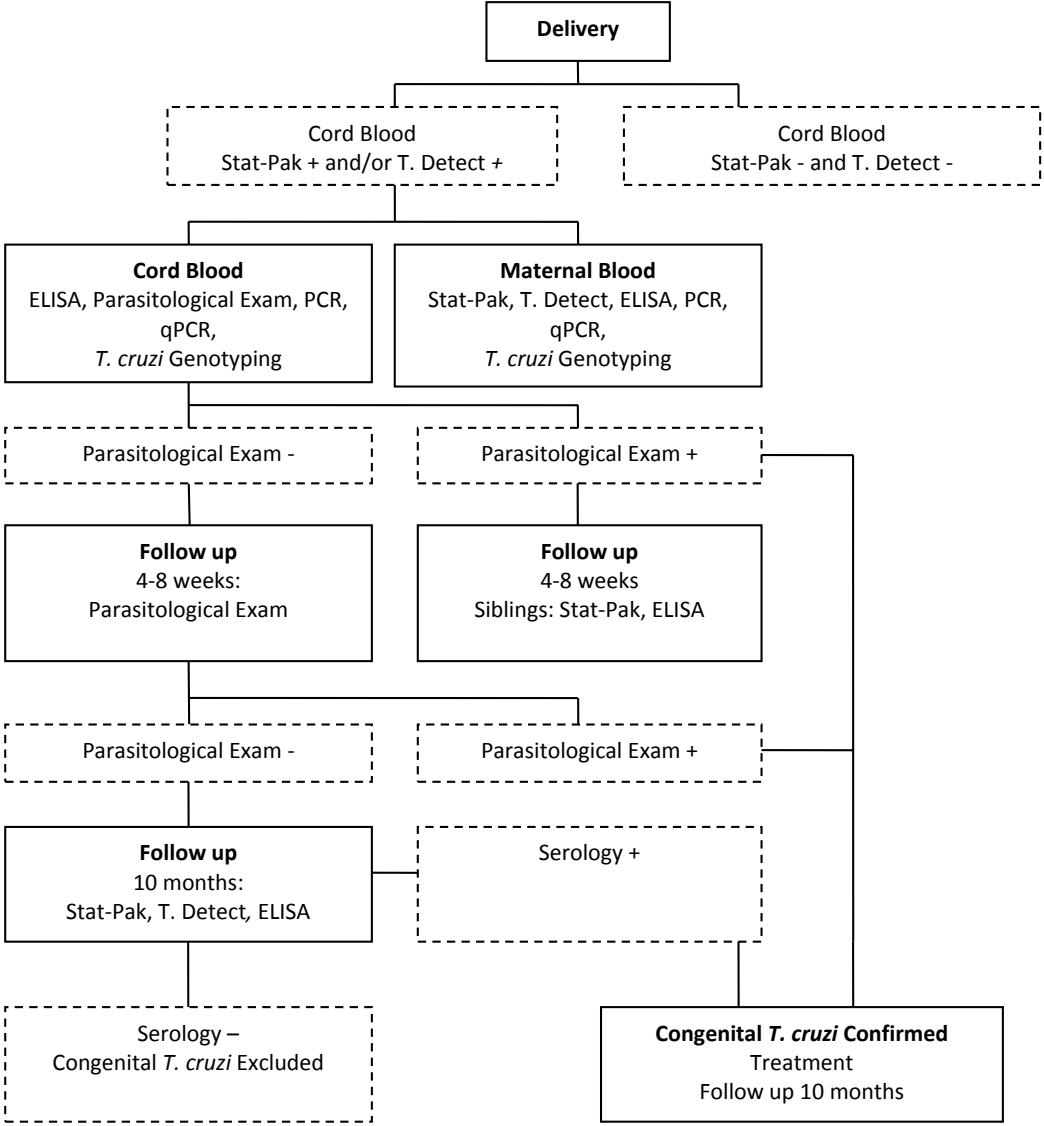

Supplement: MOESM1 [file 9602290]
